# Supplementary material for: A Cost Effective Scheme for the Highly Accurate Description of Intermolecular Binding in Large Complexes
Source: MDPI journal article supplement (doi:10.3390/ijms232415773), 2022-12-12
Supplement: s1 [file s1]

Supporting Materials to “A cost effective scheme for the highly accurate description of intermolecular binding in large complexes”  
by Czernek, Brus and Czerneková (*IJMS* **2022**)

**Contents**

|                                                                                                                                                         |                   |
|---------------------------------------------------------------------------------------------------------------------------------------------------------|-------------------|
| Figure S1: graphical presentation of the CCSD(T)/CBS interaction energies for the S22 set obtained from the S22B collection and in this work .....      | page SI2          |
| Table S1: data for Figure S1 .....                                                                                                                      | page SI3          |
| Figure S2: SAPT-DFT/CBS energies plotted against canonical CCSD(T)/CBS interaction energies for the Set3x6 .....                                        | page SI4          |
| Table S2: data for Figure S2 .....                                                                                                                      | page SI5          |
| Figure S3: DLPNO-CCSD(T <sub>0</sub> )/CBS interaction energies plotted against their DLPNO-CCSD(T <sub>1</sub> )/CBS counterparts for the Set3x6 ..... | page SI6          |
| Table S3: data for Figure S3 .....                                                                                                                      | page SI7          |
| Table S4: data for Figures 1 and 2 of the main text .....                                                                                               | pages SI8 and SI9 |
| Table S5: data for Figure 3 of the main text .....                                                                                                      | page SI10         |
| Table S6: data for Figure 5 of the main text .....                                                                                                      | page SI11         |
| Table S7: linear regression data for the furan···toluene dimer .....                                                                                    | page SI11         |

Figure S1. Graphical presentation of the CCSD(T)/CBS interaction energies for the S22 set obtained from the S22B collection (ref. [44]) and in this work. The linear regression is  $\{y\} = 0.9902 \times \{x\} - 0.0015$ , has the adjusted  $R^2 = 0.9999$  and the standard deviation of 0.28 kJ/mol.

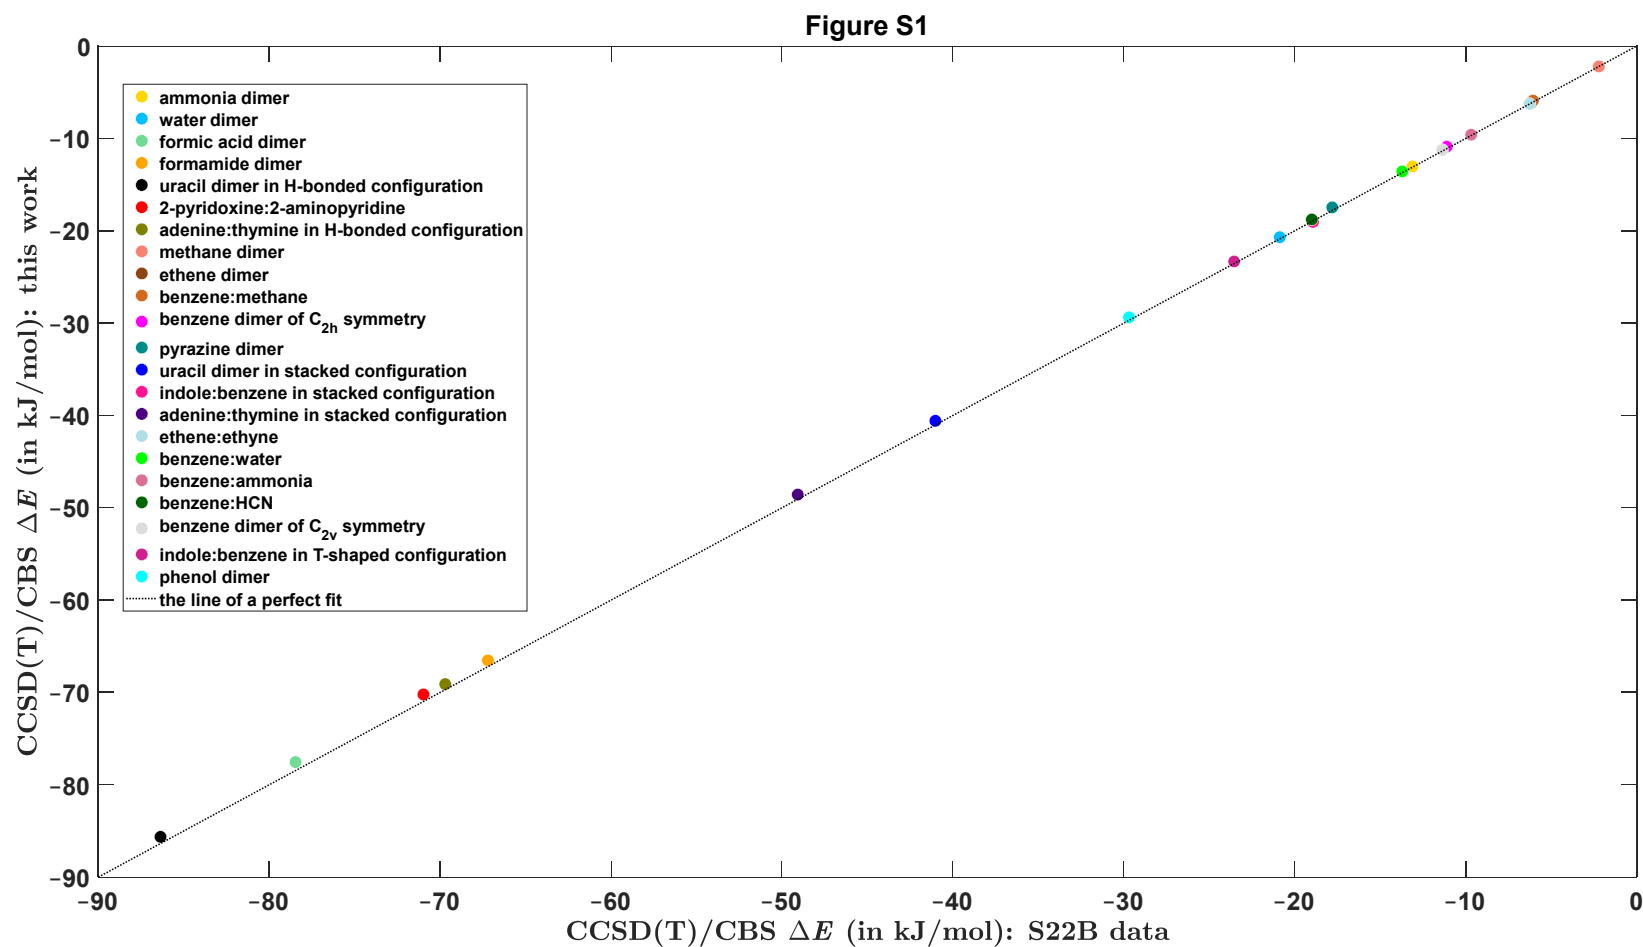

Table S1. CCSD(T)/CBS interaction energies,  $\Delta E$ , for the S22 set obtained from the S22B collection (ref. [44]) and in this work. These values are plotted in Figure S1.

| system |                                           | $-\Delta E$ (in kJ/mol) |           |
|--------|-------------------------------------------|-------------------------|-----------|
| #      | description                               | from ref. [44]          | this work |
| S01    | ammonia dimer                             | 13.1085                 | 13.0305   |
| S02    | water dimer                               | 20.8740                 | 20.6922   |
| S03    | formic acid dimer                         | 78.4626                 | 77.5433   |
| S04    | formamide dimer                           | 67.2034                 | 66.5291   |
| S05    | uracil dimer in H-bonded configuration    | 86.3619                 | 85.6371   |
| S06    | 2-pyridoxine:2-aminopyridine              | 70.9774                 | 70.2161   |
| S07    | adenine:thymine in H-bonded configuration | 69.7054                 | 69.1001   |
| S08    | methane dimer                             | 2.2050                  | 2.1896    |
| S09    | ethene dimer                              | 6.1588                  | 6.1332    |
| S10    | benzene:methane                           | 6.0584                  | 5.8910    |
| S11    | benzene dimer of $C_{2h}$ symmetry        | 11.1043                 | 10.8905   |
| S12    | pyrazine dimer                            | 17.8029                 | 17.4600   |
| S13    | uracil dimer in stacked configuration     | 41.0241                 | 40.5791   |
| S14    | indole:benzene in stacked configuration   | 18.9284                 | 19.0416   |
| S15    | adenine:thymine in stacked configuration  | 49.0783                 | 48.5693   |
| S16    | ethene:ethyne                             | 6.2593                  | 6.2466    |
| S17    | benzene:water                             | 13.7026                 | 13.5639   |
| S18    | benzene:ammonia                           | 9.6734                  | 9.5923    |
| S19    | benzene:HCN                               | 18.9995                 | 18.7783   |
| S20    | benzene dimer of $C_{2v}$ symmetry        | 11.3679                 | 11.2461   |
| S21    | indole:benzene in T-shaped configuration  | 23.5434                 | 23.3231   |
| S22    | phenol dimer                              | 29.6938                 | 29.3670   |

Figure S2. Graphical presentation of the canonical CCSD(T)/CBS interaction energies,  $\Delta E$ , and the SAPT-DFT/CBS energies,  $E$ , obtained for the Set3x6. The linear fit (shown as the blue line) is  $E = 0.9632 \times \Delta E - 0.5388$  kJ/mol with the adjusted  $R^2 = 0.9933$  and the standard deviation of 0.84 kJ/mol.

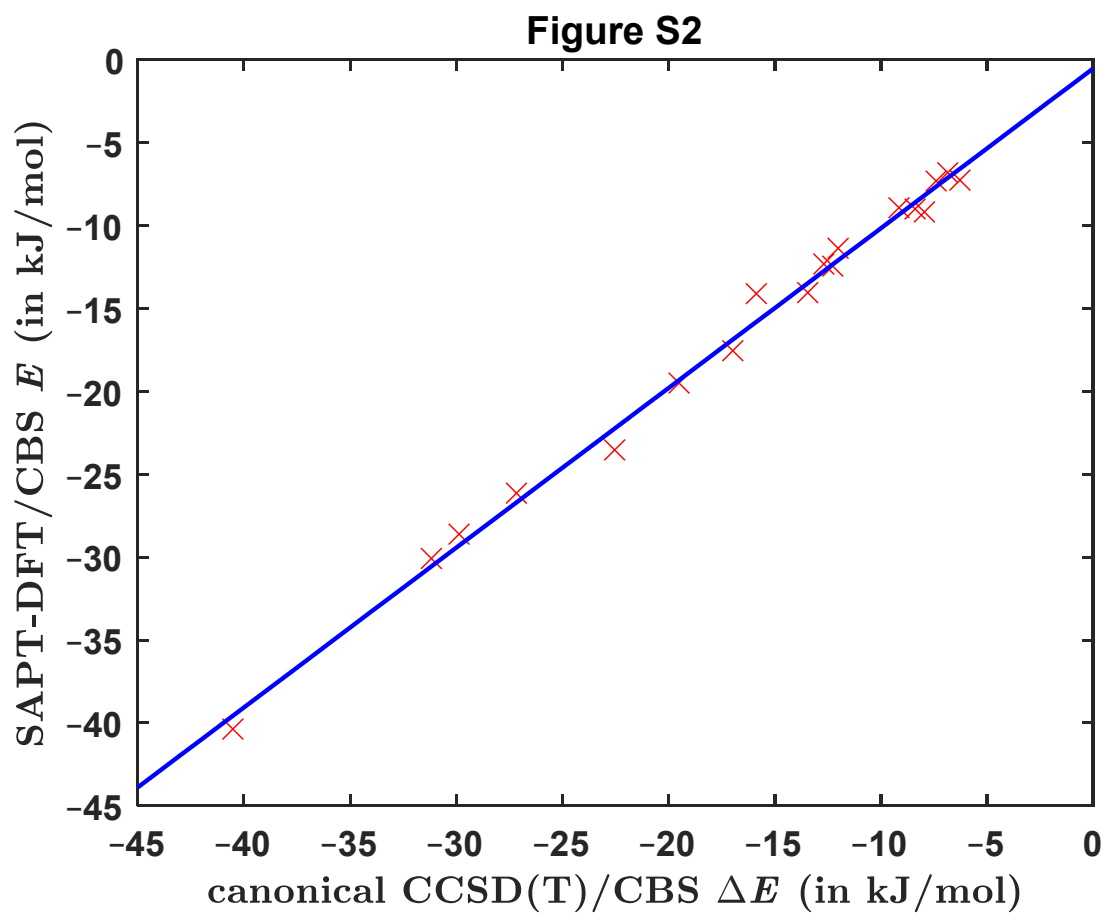

Table S2. The canonical CCSD(T)/CBS interaction energies,  $\Delta E$ , and the SAPT-DFT/CBS energies,  $E$ , obtained for the Set3x6. These values are plotted in Figure S2.

| dimer                     | CCSD(T)/CBS<br>$-\Delta E$ (in kJ/mol) | SAPT-DFT/CBS<br>$-E$ (in kJ/mol) |
|---------------------------|----------------------------------------|----------------------------------|
| aniline:methane           | 6.8409                                 | 6.8076                           |
| anisole:methane           | 7.3866                                 | 7.3111                           |
| 1-naphtol:methane         | 9.1377                                 | 8.9242                           |
| 1-naphtol:CO              | 8.3737                                 | 8.9992                           |
| 1-naphtol:CO <sub>2</sub> | 12.6781                                | 12.3131                          |
| anisole:anisole           | 27.1599                                | 26.1397                          |
| anisole:ammonia           | 12.0031                                | 11.3728                          |
| 1-naphtol:ethyne          | 16.9643                                | 17.5480                          |
| HCl:HCl                   | 7.9397                                 | 9.1796                           |
| benzene:water             | 13.4345                                | 14.0423                          |
| anisole:CO <sub>2</sub>   | 15.8595                                | 14.1078                          |
| ethyne:ethyne             | 6.2616                                 | 7.2559                           |
| 1-naphtol:ammonia         | 40.5199                                | 40.3692                          |
| HCl:water                 | 22.5321                                | 23.5324                          |
| HCN:HF                    | 31.1699                                | 30.0755                          |
| NCH:FH                    | 12.2561                                | 12.4459                          |
| HCN:HCN                   | 19.5007                                | 19.4982                          |
| 1-naphtol:water           | 29.8641                                | 28.6100                          |

Figure S3. Graphical presentation of the DLPNO-CCSD(T<sub>1</sub>)/CBS ('iterative DLPNO-CCSD(T)/CBS' in the abscissa) interaction energies and their DLPNO-CCSD(T<sub>0</sub>)/CBS ('noniterative DLPNO-CCSD(T)/CBS' in the ordinate) counterparts for the Set3x6. The linear regression is  $\{y\} = 0.9989 \times \{x\} + 0.1451$ , has the adjusted  $R^2 = 0.9998$  and the standard deviation of 0.14 kJ/mol.

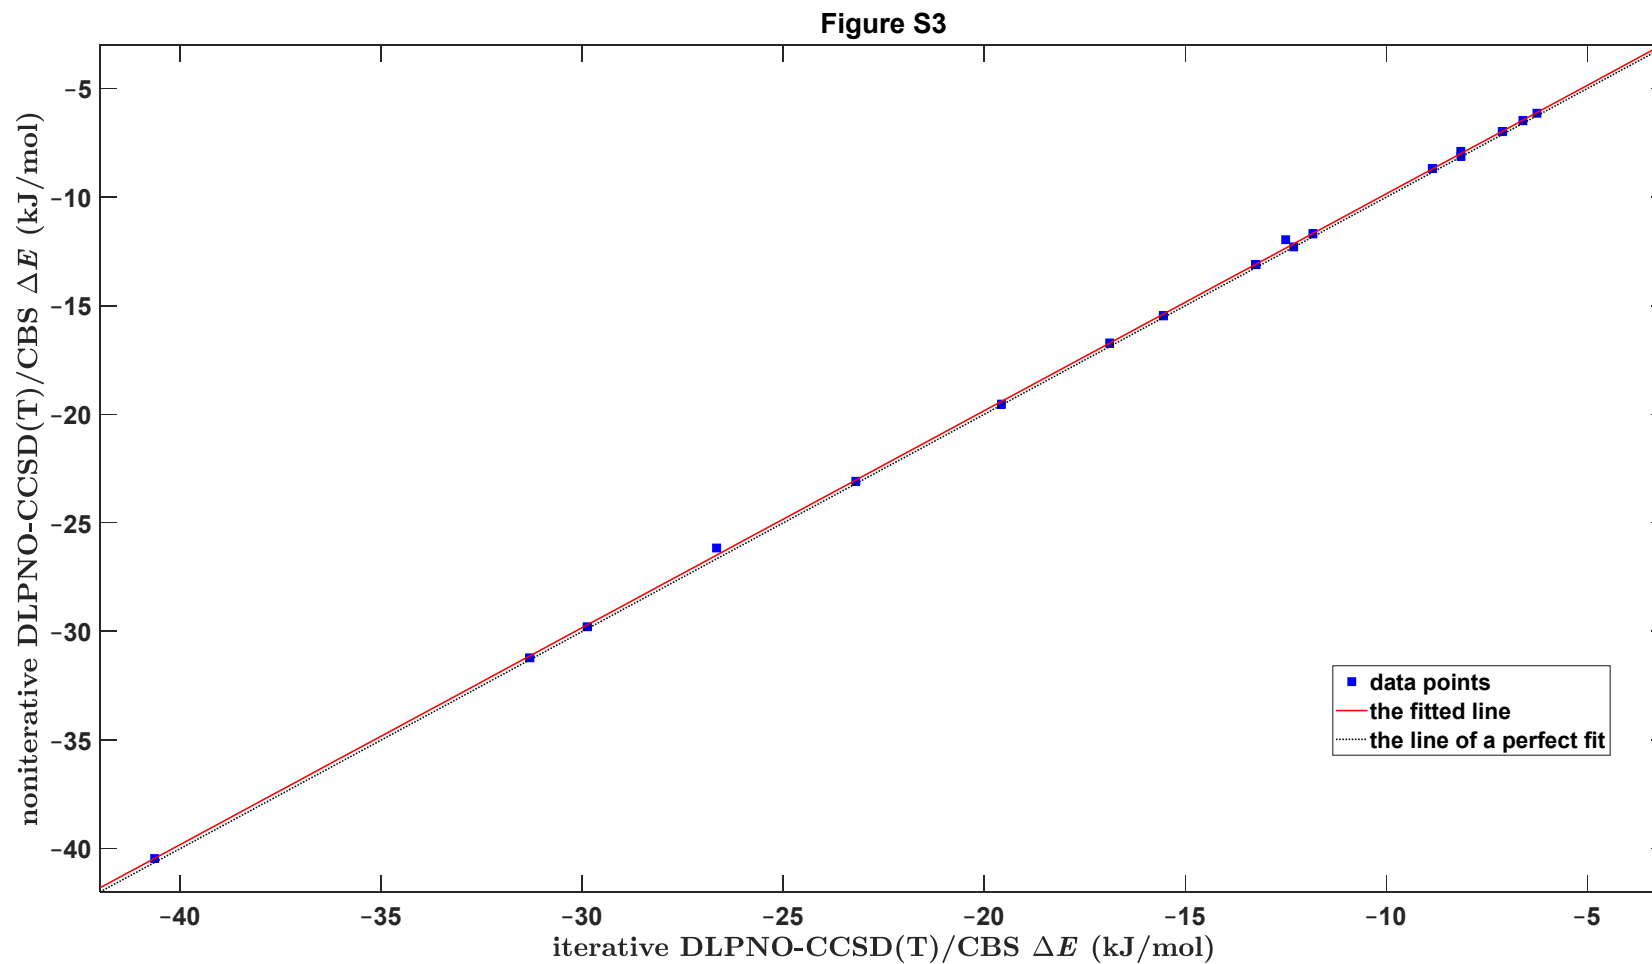

Table S3. The negative of the DLPNO-CCSD(T<sub>1</sub>)/CBS ('iterative DLPNO-CCSD(T)/CBS') and the DLPNO-CCSD(T<sub>0</sub>)/CBS ('noniterative DLPNO-CCSD(T)/CBS') interaction energy data for the Set3x6. These values are plotted in Figure S3.

| dimer                     | iterative DLPNO-<br>CCSD(T)/CBS (in kJ/mol) | noniterative DLPNO-<br>CCSD(T)/CBS (in kJ/mol) |
|---------------------------|---------------------------------------------|------------------------------------------------|
| aniline:methane           | 6.8409                                      | 6.4802                                         |
| anisole:methane           | 7.3866                                      | 6.9824                                         |
| 1-naphtol:methane         | 9.1377                                      | 8.6859                                         |
| 1-naphtol:CO              | 8.3737                                      | 7.8983                                         |
| 1-naphtol:CO <sub>2</sub> | 12.6781                                     | 11.9629                                        |
| anisole:anisole           | 27.1599                                     | 26.1590                                        |
| anisole:ammonia           | 12.0031                                     | 11.6934                                        |
| 1-naphtol:ethyne          | 16.9643                                     | 16.7201                                        |
| HCl:HCl                   | 7.9397                                      | 8.1103                                         |
| benzene:water             | 13.4345                                     | 13.1087                                        |
| anisole:CO <sub>2</sub>   | 15.8595                                     | 15.4662                                        |
| ethyne:ethyne             | 6.2616                                      | 6.1367                                         |
| 1-naphtol:ammonia         | 40.5199                                     | 40.4598                                        |
| HCl:water                 | 22.5321                                     | 23.0911                                        |
| HCN:HF                    | 31.1699                                     | 31.2180                                        |
| NCH:FH                    | 12.2561                                     | 12.2948                                        |
| HCN:HCN                   | 19.5007                                     | 19.5358                                        |
| 1-naphtol:water           | 29.8641                                     | 29.7878                                        |

Table S4. The negative of the interaction energy data from Figures 1 and 2 of the main text. All values are in kJ/mol.

| type of system                                                            | description               | canonical<br>CCSD(T)/CBS | focal-point<br>DLPNO-<br>CCSD(T)/CBS | DLPNO-<br>CCSD(T)/CBS<br>(aTZ→a5Z) |
|---------------------------------------------------------------------------|---------------------------|--------------------------|--------------------------------------|------------------------------------|
| from the Set22<br>(the dimers<br>S01–S22 are<br>specified in<br>Table S1) | S01                       | 13.0305                  | 13.0142                              | 12.8962                            |
|                                                                           | S02                       | 20.6922                  | 20.7372                              | 20.5690                            |
|                                                                           | S03                       | 77.5433                  | 77.8386                              | 77.2000                            |
|                                                                           | S04                       | 66.5291                  | 66.4772                              | 65.8758                            |
|                                                                           | S05                       | 85.6371                  | 85.0352                              | 84.7209                            |
|                                                                           | S06                       | 70.2161                  | 70.5020                              | 70.2370                            |
|                                                                           | S07                       | 69.1001                  | 68.2809                              | 67.9070                            |
|                                                                           | S08                       | 2.1896                   | 2.1279                               | 2.1119                             |
|                                                                           | S09                       | 6.1332                   | 6.0008                               | 5.9369                             |
|                                                                           | S10                       | 5.8910                   | 5.7626                               | 5.6794                             |
|                                                                           | S11                       | 10.8905                  | 9.8440                               | 9.7653                             |
|                                                                           | S12                       | 17.4600                  | 16.2025                              | 16.0482                            |
|                                                                           | S13                       | 40.5791                  | 38.6929                              | 38.4389                            |
|                                                                           | S14                       | 19.0416                  | 16.9231                              | 16.8979                            |
|                                                                           | S15                       | 48.5693                  | 46.2843                              | 46.4699                            |
|                                                                           | S16                       | 6.2466                   | 6.0974                               | 6.0349                             |
|                                                                           | S17                       | 13.5639                  | 13.2741                              | 13.1535                            |
|                                                                           | S18                       | 9.5923                   | 9.3236                               | 9.2315                             |
|                                                                           | S19                       | 18.7783                  | 18.5571                              | 18.4302                            |
|                                                                           | S20                       | 11.2461                  | 11.3192                              | 11.1230                            |
|                                                                           | S21                       | 23.3231                  | 23.1684                              | 23.0930                            |
|                                                                           | S22                       | 29.3670                  | 29.2546                              | 29.2582                            |
| dispersion-<br>dominated<br>complex from<br>Set3x6                        | aniline:methane           | 6.8409                   | 6.4802                               | 6.3846                             |
|                                                                           | anisole:methane           | 7.3866                   | 6.9824                               | 6.8524                             |
|                                                                           | 1-naphtol:methane         | 9.1377                   | 8.6859                               | 8.5497                             |
|                                                                           | 1-naphtol:CO              | 8.3737                   | 7.8983                               | 8.1819                             |
|                                                                           | 1-naphtol:CO <sub>2</sub> | 12.6781                  | 11.9629                              | 11.9234                            |
|                                                                           | anisole:anisole           | 27.1599                  | 26.1590                              | 26.1702                            |
| mixed-<br>interactions<br>complex from<br>Set3x6                          | anisole:ammonia           | 12.0031                  | 11.6934                              | 11.7319                            |
|                                                                           | 1-naphtol:ethyne          | 16.9643                  | 16.7201                              | 16.4847                            |
|                                                                           | HCl:HCl                   | 7.9397                   | 8.1103                               | 7.8506                             |
|                                                                           | benzene:water             | 13.4345                  | 13.1087                              | 12.9320                            |
|                                                                           | anisole:CO <sub>2</sub>   | 15.8595                  | 15.4662                              | 15.3480                            |
|                                                                           | ethyne:ethyne             | 6.2616                   | 6.1367                               | 6.1881                             |



eleven pages in total

|                                                        |                               |         |         |         |
|--------------------------------------------------------|-------------------------------|---------|---------|---------|
| electrostatics-<br>dominated<br>complex from<br>Set3x6 | 1-naphtol:ammonia             | 40.5199 | 40.4598 | 40.2566 |
|                                                        | HCl:water                     | 22.5321 | 23.0911 | 22.5870 |
|                                                        | HCN:HF                        | 31.1699 | 31.2180 | 30.9987 |
|                                                        | NCH:FH                        | 12.2561 | 12.2948 | 12.2215 |
|                                                        | HCN:HCN                       | 19.5007 | 19.5358 | 19.4400 |
|                                                        | 1-naphtol:water               | 29.8641 | 29.7878 | 29.6252 |
| furan:toluene<br>stacked<br>complex from<br>ref. [50]  | configuration #1              | 14.4349 | 13.6841 | 13.4646 |
|                                                        | configuration #2              | 13.9410 | 12.9909 | 13.0000 |
|                                                        | configuration #3              | 12.6215 | 11.9214 | 11.7363 |
|                                                        | configuration #4              | 12.8154 | 12.0660 | 11.9985 |
|                                                        | configuration #5              | 12.0621 | 11.3746 | 11.3712 |
|                                                        | configuration #6              | 11.0006 | 10.3386 | 10.5337 |
|                                                        | configuration #7              | 9.6457  | 9.4687  | 9.0669  |
| miscellaneous                                          | anthracene:<br>cyclopropenium | 88.8474 | 87.7087 | 87.0019 |
|                                                        | pyridine:pyridine             | 15.8174 | 14.8574 | 14.7448 |

Table S5. The negative of the interaction energy data from Figure 3 of the main text. All values are in kJ/mol.

| type of system                                      | description                   | canonical<br>CCSD(T)/CBS | approximated<br>CCSD(T)/CBS |
|-----------------------------------------------------|-------------------------------|--------------------------|-----------------------------|
| dispersion-<br>dominated complex<br>from Set3x6     | aniline:methane               | 29.8641                  | 29.4069                     |
|                                                     | anisole:methane               | 12.6781                  | 11.8102                     |
|                                                     | 1-naphtol:methane             | 6.8409                   | 6.5375                      |
|                                                     | 1-naphtol:CO                  | 7.3866                   | 7.0066                      |
|                                                     | 1-naphtol:CO <sub>2</sub>     | 31.1699                  | 31.0802                     |
|                                                     | anisole:anisole               | 12.2561                  | 11.9452                     |
| mixed-interactions<br>complex from<br>Set3x6        | anisole:ammonia               | 27.1599                  | 26.3823                     |
|                                                     | 1-naphtol:ethyne              | 9.1377                   | 8.6573                      |
|                                                     | HCl:HCl                       | 8.3737                   | 7.7178                      |
|                                                     | benzene:water                 | 40.5199                  | 40.3112                     |
|                                                     | anisole:CO <sub>2</sub>       | 12.0031                  | 11.7578                     |
|                                                     | ethyne:ethyne                 | 16.9643                  | 16.9575                     |
| electrostatics-<br>dominated complex<br>from Set3x6 | 1-naphtol:ammonia             | 7.9397                   | 7.9303                      |
|                                                     | HCl:water                     | 13.4345                  | 13.2035                     |
|                                                     | HCN:HF                        | 15.8595                  | 15.2338                     |
|                                                     | NCH:FH                        | 6.2616                   | 6.3140                      |
|                                                     | HCN:HCN                       | 22.5321                  | 22.0560                     |
|                                                     | 1-naphtol:water               | 19.5007                  | 19.4882                     |
| furan:toluene<br>stacked complex<br>from ref. [50]  | configuration #1              | 14.4349                  | 13.6660                     |
|                                                     | configuration #2              | 13.9410                  | 12.8667                     |
|                                                     | configuration #3              | 12.6215                  | 12.0365                     |
|                                                     | configuration #4              | 12.8154                  | 11.9090                     |
|                                                     | configuration #5              | 12.0621                  | 11.3044                     |
|                                                     | configuration #6              | 11.0006                  | 10.1508                     |
|                                                     | configuration #7              | 9.6457                   | 8.1819                      |
| miscellaneous                                       | anthracene:<br>cyclopropenium | 88.8474                  | 87.1310                     |
|                                                     | pyridine:pyridine             | 15.8174                  | 14.7422                     |

Table S6. The negative of the interaction energy data from Figure 5 of the main text. All values are in kJ/mol.

| furan:toluene<br>configuration | canonical<br>CCSD(T)/CBS | DLPNO-<br>CCSD(T)/CBS | extrapolated<br>(aDZ, aTZ) | DLPNO-<br>CCSD(T)/<br>cc-pVQZ | SAPT-<br>DFT/CBS |
|--------------------------------|--------------------------|-----------------------|----------------------------|-------------------------------|------------------|
| #1                             | 14.4349                  | 13.6841               | 13.6660                    | 17.4885                       | 14.5393          |
| #2                             | 13.9410                  | 12.9909               | 12.8667                    | 17.0631                       | 14.2296          |
| #3                             | 12.6215                  | 11.9214               | 12.0365                    | 15.7320                       | 12.9284          |
| #4                             | 12.8154                  | 12.0660               | 11.9090                    | 15.5797                       | 13.1685          |
| #5                             | 12.0621                  | 11.3746               | 11.3044                    | 15.0651                       | 12.4759          |
| #6                             | 11.0006                  | 10.3386               | 10.1508                    | 13.5870                       | 11.4910          |
| #7                             | 9.6457                   | 9.4687                | 8.1819                     | 12.1771                       | 10.1160          |

Table S7. Parameters of the linear regression for 7 configurations of the furan···toluene dimer described in the text;  $\{y\} = a \times \{x\} + b$ , where  $\{x\}$  represents the canonical  $\Delta E_{\text{CCSD(T)}}^{\text{CBS}}$  data and  $\sigma$  is the standard deviation of residuals. The  $\{x\}$ ,  $\{y\}$  dataset are available from Table S6.

| method to obtain<br>dataset $\{x\}$ | $a$    | $b$ (in kJ/mol) | $\sigma$ (in kJ/mol) | adjusted $R^2$ |
|-------------------------------------|--------|-----------------|----------------------|----------------|
| DLPNO-<br>CCSD(T)/CBS               | 0.8780 | 0.839           | 0.123                | 0.9913         |
| extrapolated<br>(aDZ, aTZ)          | 1.126  | 1.33            | 0.433                | 0.9931         |
| DLPNO-CCSD(T)/<br>cc-pVQZ           | 1.091  | -2.04           | 0.427                | 0.9789         |
| SAPT-DFT/CBS                        | 0.9296 | 1.22            | 0.105                | 0.9981         |
